RESEARCH ARTICLE

# Comparison of Modic Changes in the Lumbar and Cervical Spine, in 3167 Patients with and without Spinal Pain

Li Sheng-yun<sup>¶1</sup>, Suyou Letu<sup>¶1</sup>, Chen Jian, Maiwulanjiang Mamuti, Liu Jun-hui, Shan Zhi, Wang Chong-yan, Fan Shunwu, Fengdong Zhao\*

Department of Orthopaedics, Sir Run Run Shaw Hospital, School of Medicine, Zhejiang University, Hangzhou, 310016, P.R. China

\*zhaodong68@hotmail.com

¶ These authors contributed equally to this work.

¶ These authors should be considered co-first authors.

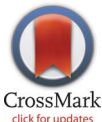

click for updates

 OPEN ACCESS

**Citation:** Sheng-yun L, Letu S, Jian C, Mamuti M, Jun-hui L, et al. (2014) Comparison of Modic Changes in the Lumbar and Cervical Spine, in 3167 Patients with and without Spinal Pain. PLoS ONE 9(12): e114993. doi:10.1371/journal.pone.0114993

**Editor:** Paul Park, University of Michigan, United States of America

**Received:** May 11, 2014

**Accepted:** November 17, 2014

**Published:** December 15, 2014

**Copyright:** © 2014 Sheng-yun et al. This is an open-access article distributed under the terms of the [Creative Commons Attribution License](https://creativecommons.org/licenses/by/4.0/), which permits unrestricted use, distribution, and reproduction in any medium, provided the original author and source are credited.

**Data Availability:** The authors confirm that all data underlying the findings are fully available without restriction. All relevant data are within the paper.

**Funding:** This study was partially supported by the National Natural Science Foundation of China (31270997 and 81171739). The funder had no role in study design, data collection and analysis, decision to publish, or preparation of the manuscript.

**Competing Interests:** The authors have declared that no competing interests exist.

## Abstract

**Background Context:** There are few comparisons of Modic changes (MCs) in the lumbar and cervical spine.

**Purpose:** Compare the prevalence of MCs in the lumbar and cervical spine, and determine how MC prevalence depends on spinal pain, age, disc degeneration, spinal level, and the presence or absence of kyphosis.

**Study Design:** Retrospective clinical survey.

**Materials and Methods:** Magnetic resonance images (MRIs) were compared from five patient groups: 1. 1223 patients with low-back pain/radiculopathy only; 2. 1023 patients with neck pain/radiculopathy only; 3. 497 patients with concurrent low-back and neck symptoms; 4. 304 asymptomatic subjects with lumbar MRIs; and 5. 120 asymptomatic subjects with cervical MRIs.

**Results:** The prevalence of MCs was higher in those with spinal pain than in those without, both in the lumbar spine (21.0% vs 10.5%) and cervical spine (8.8% vs 3.3%). Type II MCs were most common and Type III were least common in all groups. The prevalence of lumbar MCs in people with back pain was little affected by the presence of concurrent neck pain, and the same was true for the prevalence of cervical MCs in people with neck pain with or without concurrent back pain. When symptomatic patients were reclassified into two groups (back pain, neck pain), the prevalence of lumbar MCs in people with back pain was greater than that of cervical MCs in people with neck pain. The prevalence of lumbar and cervical MCs increased with age, disc degeneration, (descending) spinal level, and increased kyphosis.

**Conclusions:** There is a significantly higher prevalence of MCs in patients with back and neck pain. The reported association with increased kyphosis (flat back) is novel.

---

## Introduction

Degenerative changes of the vertebral endplate or “Modic changes” (MCs), have been considered important in low back pain since Modic first described them in magnetic resonance images (MRI) from patients with spinal degeneration [1–3]. Initially, two types were described and a third was defined subsequently. According to Modic, Type I changes appear hypointense on T1-weighted imaging (T1WI) and hyperintense on T2-weighted imaging (T2WI). Type I MCs are associated with fissuring of the cartilaginous endplate and increased vascularity or oedema within the subchondral bone marrow. Type II MCs appear hyperintense on T1WI and isointense or hyperintense on T2WI. Signal changes are less marked for Type II than for Type I, and reflect fatty degeneration of the bone marrow, or endplate necrosis. Type III MCs appear hypointense on both T1WI and T2WI and are assumed to represent subchondral bone sclerosis (Table 1). Previous studies of Modic changes have focused mainly on their pathogenesis and the clinical significance of changes between different types of MC, as well as their relationship with low back pain [4–8]. The main cause of MCs has been attributed to minor trauma of the endplate as a result of repetitive loading [9] or to recurrent disc injury which causes an inflammatory reaction within the nucleus pulposus, initiating endplate changes and subsequent back pain [10]. More recent findings suggest that levels of IL6, IL8 and PGE2 in the intervertebral disc are significantly higher when Modic Type I changes are present compared to Type II, suggesting that inflammatory changes in the disc may be involved in the initiation of Type I changes [11]. However, pathological changes in the spine are dynamic and the natural history of MCs suggests that they are reversible and this has raised doubts concerning the usefulness of these MRI changes as an indicator of clinical symptoms or surgical outcomes [12].

If Modic changes represent a progressive response to injury then it is possible that some types of Modic change may be more highly correlated with pain than others, especially if they are linked with inflammatory changes. Modic changes have been studied most extensively in the lumbar spine where they are most common [9–11, 13] and some studies have suggested strong links with pain and disc degeneration. [14] However, relatively little is known about the prevalence or distribution of MCs in other regions of the spine and whether they are associated with symptoms. The cervical spine, like the lumbar spine, is highly mobile and is prone to degeneration and pain. Furthermore, clinical evidence suggests that Modic changes are often observed in people with neck pain. The aim of this study, therefore, was to evaluate the distribution and prevalence of the different types of

**Table 1.** Three types of Modic change.

| Modic type | T1 signal | T2 signal                  | represents                            |
|------------|-----------|----------------------------|---------------------------------------|
| 0          | Normal    | Normal                     | Normal                                |
| I          | LOW       | HIGH                       | Vascularized bone marrow and/or edema |
| II         | HIGH      | Isointense or hyperintense | Proliferation of fatty tissue         |
| III        | LOW       | LOW                        | Sclerotic bone                        |

doi:10.1371/journal.pone.0114993.t001

Modic change in the lumbar and cervical spine in people with back and/or neck pain and to determine how they are influenced by factors such as pain, age, degeneration, spinal level, and the presence of kyphosis.

## Materials and Methods

### Study Design

The medical records of patients attending the Sir Run Run Shaw Hospital over a 12 month period (Jan–Dec 2011) were reviewed to identify all patients who had back and/or neck pain. The MRI scans of these patients were then assessed to evaluate disc degeneration, sagittal spinal curvature and the presence and type of Modic changes in the lumbar and/or cervical spine. In order to investigate whether pain is associated with a higher prevalence of MCs, we also collected MRI scans from 424 asymptomatic patients who underwent physical examination in the authors’ hospital between January and December 2011. Patients with any pathological lesions, such as tumor, infection, fracture or congenital abnormality, were excluded. The study was approved by the Medical Ethics Committee of Sir Run Run Shaw hospital, and all patients gave written informed consent for their information to be stored in the hospital database and used for research.

### Patient populations

Patients were subdivided into five groups: 1. a “back pain” group comprising 1223 patients (650 males and 573 females) with a mean age of  $45.3 \pm 12.7$  yrs (range 22–85 yrs) who had low-back pain or sciatica only; 2. a “neck pain” group comprising 1023 patients (536 males and 497 females) with a mean age of  $44.9 \pm 11.1$  yrs (range 19–86 yrs) who had neck pain or radiculopathy only; 3. a “back and neck pain” group comprising 497 patients (281 males and 216 females) with a mean age of  $44 \pm 9.3$  yrs (range 22–73 yrs) who had both low-back pain and neck pain concurrently; 4. asymptomatic lumbar group comprising 304 patients (196 males and 108 females) with a mean age of  $44.8 \pm 9.5$  yrs (range 24–64 yrs) and 5. asymptomatic cervical group comprising 120 patients (40 males and 80 females) with a mean age of  $43.3 \pm 10.2$  yrs (range 24–64 yrs).

MRI scans of all patients in the three symptomatic groups were reviewed to determine the prevalence and types of MCs and investigate their associations with

disc degeneration, disc level, age, and spinal kyphosis. Subsequently, symptomatic patients were reclassified into two groups. Group 6 comprised all patients with back pain, and Group 7 comprised all patients with neck pain. The prevalence of MCs in Groups 6 and 7 were investigated to determine whether the prevalence of MCs in the lumbar spine of low back pain patients is different from the prevalence of MCs in the cervical spine of neck pain patients. Groups 6 and 7 were also compared with the corresponding asymptomatic groups (4 and 5 respectively) to determine whether MCs are more prevalent in people with back and neck pain.

### MR image evaluation

All lumbar MR scans were performed on a GE Sigma CV/I (1.5 T) using a surface coil. Sagittal T1- and T2-weighted imaging sequences (T1WI and T2WI) were used to examine the lumbar spine. T1-weighted images were obtained using repetition/echo times of 420/13 msec and a bandwidth of 140 Hz/Px, while T2-weighted images used 2300/105 msec and 160 Hz/Px. The matrix size was  $320 \times 224$  for both T1 and T2 images, with a field of view of  $28 \times 28$  mm. Slice thickness and inter-slice gap were 4 mm and 1 mm respectively for both T1 and T2 images. For each imaged lumbar spine, nine sagittal slices were obtained for both T1WIs and T2WIs. For the cervical spine, T1- and T2-weighted sequences were obtained on the same machine using the same parameters as those used for the lumbar images, except that the slice thickness was set at 3.0 mm.

All MRIs were evaluated by two independent observers, an experienced radiologist and an orthopaedic surgeon, in order to determine the intra-observer and inter-observer reliability of these measurements.

### Type of Modic change

According to the classification criteria of MCs [1–3], there are four categories of endplate change (Table 1). Type 0: the endplate signal is normal; Type I: the endplate shows regions that are hypointense on T1WI and hyperintense on T2WI (Fig. 1 and Fig. 2); Type II: the endplate shows regions that are hyperintense on T1WI and isointense or hyperintense on T2WI (Fig. 3 and Fig. 4), but the signal changes are less marked than for Type I; Type III: the endplate shows regions that are hypointense on both T1WI and T2WI (Fig. 5 and Fig. 6). The pathological change associated with Type I MCs is endplate neovascularity or edema. Type II MCs reflect fatty change or necrosis of the endplate, and Type III represent endplate sclerosis.

### Grade of disc degeneration

Intervertebral disc degeneration was classified into five grades based on the T2-weighted MRI, according to the criteria of Pfirrmann [13].

### Spinal curvature (lordosis)

Lumbar lordosis was assessed using the Seze method (Fig. 7). In the sagittal plane, a curved line (B) is drawn connecting the posterior edges of all vertebral bodies from L1 to S1, and a straight line (A) is drawn from the inferior posterior edge of

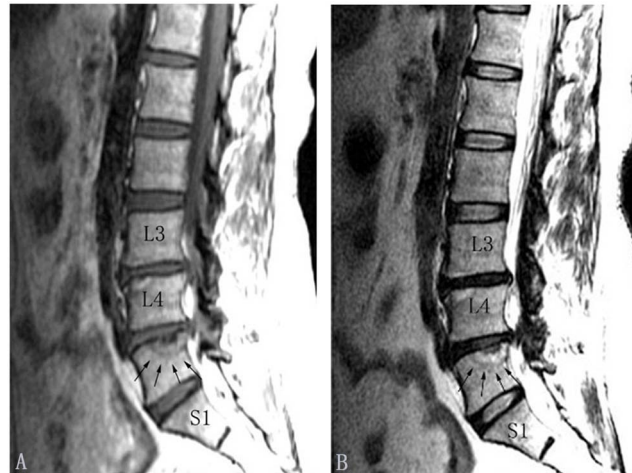

**Fig. 1. Modic type I changes in the lumbar spine (indicated by arrows).** Modic type I changes appear hypointense on T1-weighted images (A) and hyperintense on T2-weighted images (B).

doi:10.1371/journal.pone.0114993.g001

T12 to the superior posterior edge of S1. A third line (C) is then drawn perpendicular to line B, at the point where the distance between lines A and B is greatest. The length of line C was then used to evaluate the sagittal curvature of the lumbar spine. According to Seze, the majority of cases fall within the range of 18–22 mm. Compared to normal values, there is lessening or even reversal of the lumbar lordosis in individuals with a value of  $C < 18$  mm and a larger lumbar lordosis in individuals with  $C > 22$  mm [15]. In this study, values of C below 18 mm were classified as kyphotic and values of 18 mm or above were classified as non-kyphotic.

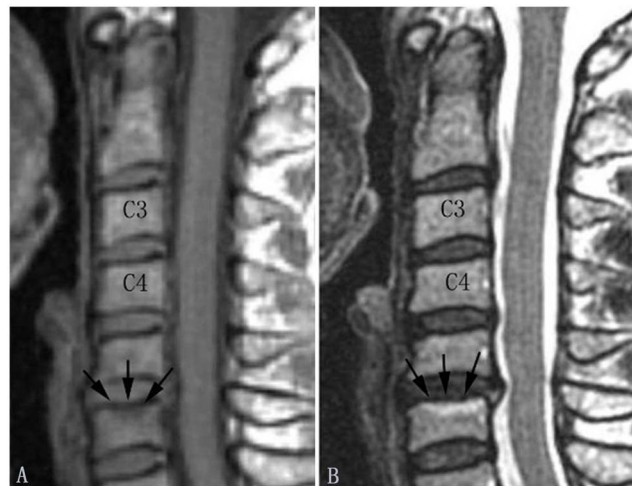

**Fig. 2. Modic type I changes in the cervical spine (indicated by arrows).** Modic type I changes appear hypointense on T1-weighted images (A) and hyperintense on T2-weighted images (B).

doi:10.1371/journal.pone.0114993.g002

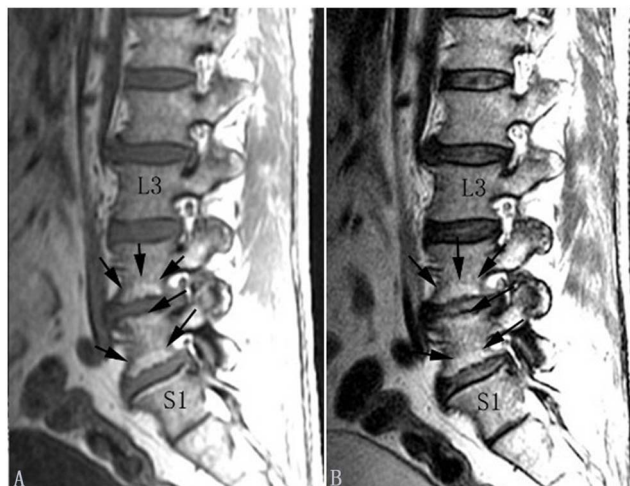

**Fig. 3. Modic type II changes in the lumbar spine (indicated by arrows).** Modic type II changes appear hyperintense on T1-weighted (A) and isointense or hyperintense on T2-weighted images (B).

doi:10.1371/journal.pone.0114993.g003

Borden’s method was used to measure cervical lordosis (Fig. 8). In the sagittal plane, a curved line (B) is drawn connecting the posterior edges of all vertebral bodies and a straight line (A) is drawn from the superior posterior edge of the odontoid to the inferior posterior edge of the C7 vertebral body. A third line (C) is then drawn perpendicular to line B, at the point where the distance between lines A and B is greatest. The length of line C was then used to evaluate the sagittal curvature of the cervical spine. According to Borden, the majority of cases fall within the range of 7–17 mm. Compared to normal values, there is a lessening or even reversal of the cervical lordosis in individuals with a value of  $C < 7$  mm and a

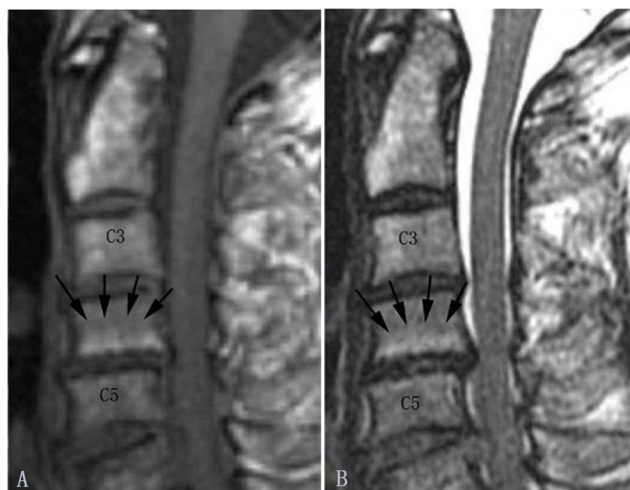

**Fig. 4. Modic type II changes in the cervical spine (indicated by arrows).** Modic type II changes appear hyperintense on T1-weighted (A) and isointense or hyperintense on T2-weighted images (B).

doi:10.1371/journal.pone.0114993.g004

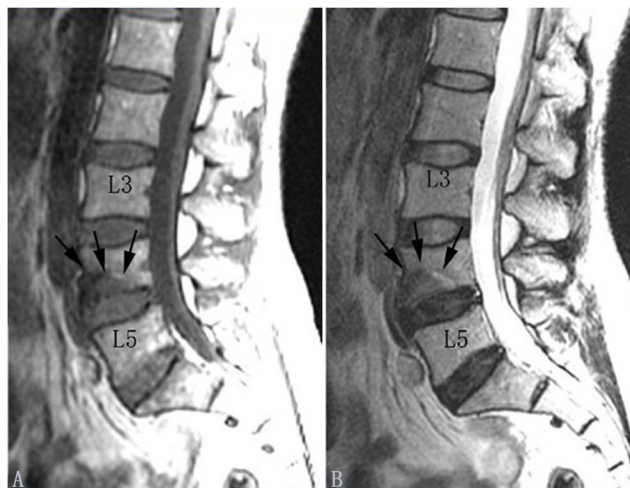

**Fig. 5. Modic type III changes in the lumbar spine (indicated by arrows).** Modic type III changes appear hypointense on T1-weighted (A) and hypointense on T2-weighted images (B).

doi:10.1371/journal.pone.0114993.g005

larger cervical lordosis in individuals with  $C > 17$  mm [16]. In this study, values of  $C$  below 7 mm were classified as kyphotic and values of 7 mm or above were classified as non-kyphotic.

### Statistical analysis

The kappa statistic was used to evaluate the inter-observer and intra-observer reliability of the grading of MCs and disc degeneration from MRI. A kappa value of 0.5 was considered to indicate moderate agreement, with a value of 0.8 or higher indicating substantial agreement.

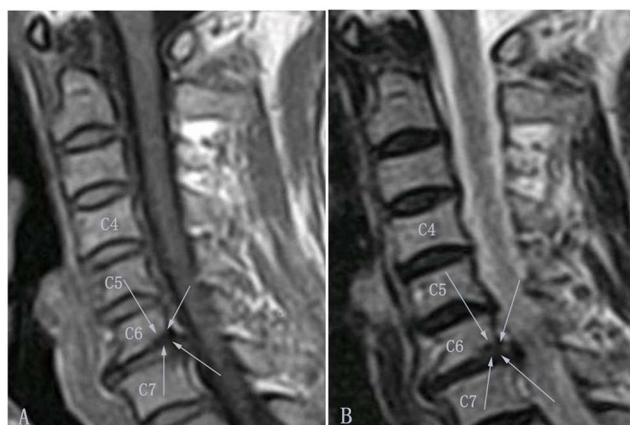

**Fig. 6. Modic type III changes in the cervical spine (indicated by arrows).** Modic type III changes appear hypointense on T1-weighted (A) and hypointense on T2-weighted images (B).

doi:10.1371/journal.pone.0114993.g006

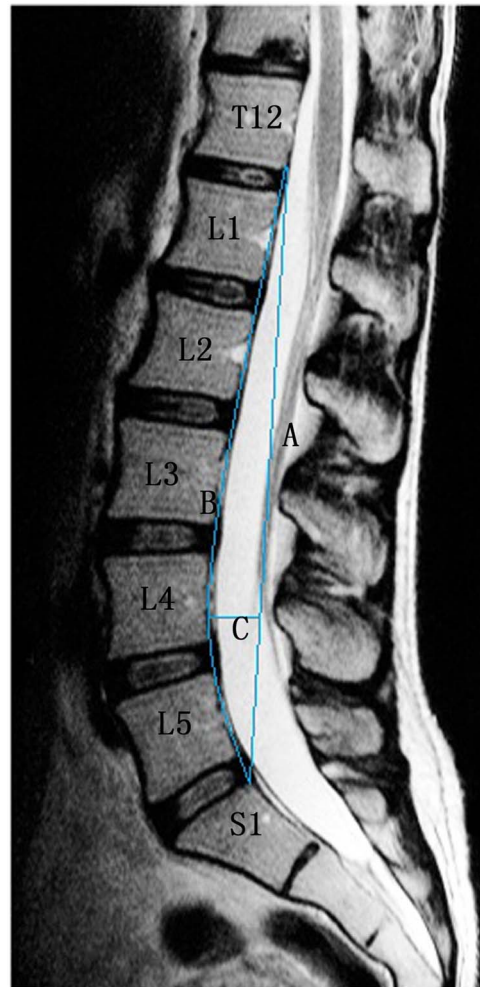

**Fig. 7. Seze method.** A straight line is drawn from the superior posterior aspect of the odontoid process of the T12 vertebra to the posterior inferior aspect of the body of the S1 vertebra named line A. Another line is traced along the posterior aspect of the intervening lumbar vertebral bodies named line B. The third line intersects A perpendicularly at the point of greatest distance between lines A and B. The length of C recorded in millimeters is the depth of the lumbar lordosis.

doi:10.1371/journal.pone.0114993.g007

In symptomatic Groups 1 to 3, the prevalence of the three types of MCs at lumbar and cervical levels were compared using the Chi-squared test. Correlations between the prevalence of MCs and disc degeneration, spinal level, and age were assessed using the Spearman rank correlation test, and comparisons of MCs between individuals with kyphotic and non-kyphotic spinal curves were assessed using the Chi-squared test. The Chi-squared test was also used to compare the prevalence of MCs in patients with any back pain (Group 6) or neck pain (Group 7) with the corresponding asymptomatic groups (i.e. Groups 4 and 5, respectively). Statistical software (SPSS 15.0) was used for analysis.



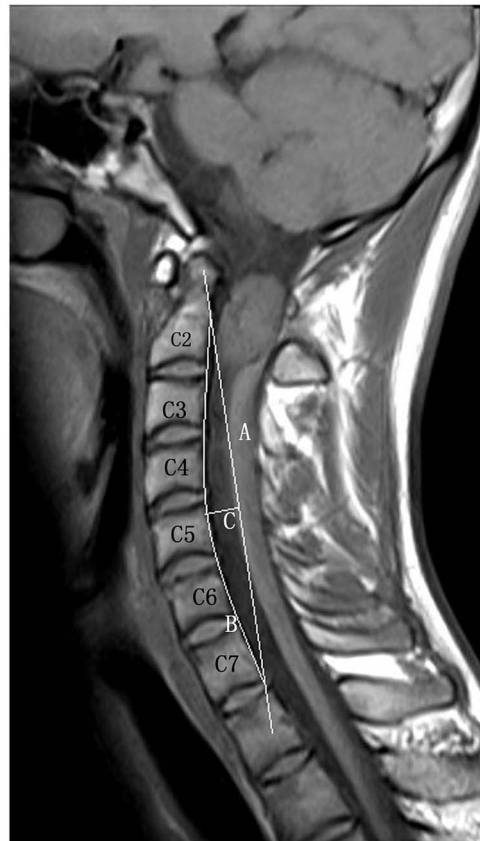

**Fig. 8. Borden method.** A straight line is drawn from the superior posterior aspect of the odontoid process of the C2 vertebra to the posterior inferior aspect of the body of the C7 vertebra named line A. Another line is traced along the posterior aspect of the intervening cervical vertebral bodies named line B. The third line intersects A perpendicularly at the point of greatest distance between lines A and B. The length of C recorded in millimeters is the depth of the cervical lordosis.

doi:10.1371/journal.pone.0114993.g008

## Results

Kappa values for the intra- and inter-observer analysis of the grading of MCs and disc degeneration were all between 0.74 and 0.89, indicating good to excellent reliability.

The prevalence of the different types of MCs in all patient groups is shown in [Table 2](#). In both lumbar and cervical regions, Type II MCs were most common, occurring in 66–85% of affected endplates in Groups 1 to 5, and Type III were least common, occurring in only 0–6% of affected endplates.

### Comparison of the three symptomatic groups (Groups 1 to 3)

The prevalence of MCs in the lumbar spine was slightly higher in the back pain group compared to the back and neck pain group. Similarly, the prevalence of MCs in the cervical spine was slightly higher in the neck pain group compared to the back and neck pain group ([Table 2](#)). Based on these findings, symptomatic

**Table 2.** Prevalence of Modic changes in different patient groups.

| Patient Group                    | Gp 1      | Gp 2     | Gp 4     | Gp 5    | Gp 6      | Gp 7     | Gp 3 cervical | Gp 3 lumbar |
|----------------------------------|-----------|----------|----------|---------|-----------|----------|---------------|-------------|
| Number of patients               | 1223      | 1023     | 304      | 120     | 1720      | 1520     | 497           | 497         |
| Number (%) of patients with MCs  | 257(21.0) | 90 (8.8) | 32(10.5) | 4 (3.3) | 337(19.6) | 132(8.7) | 42(8.5)       | 80(16.1)    |
| Number of endplates              | 6115      | 6138     | 1520     | 720     | 8600      | 9120     | 2982          | 2485        |
| Number (%) of endplates with MCs | 334(5.5)  | 108(1.8) | 48(3.2)  | 5(0.7)  | 437(5.1)  | 152(1.7) | 44(1.5)       | 103(4.1)    |
| Number (%) of Type I             | 58(1.0)   | 35(0.6)  | 5(0.3)   | 1(0.1)  | 77(0.9)   | 48(0.5)  | 13(0.4)       | 19(0.8)     |
| Number (%) of Type II            | 273(4.5)  | 70(1.1)  | 40(2.6)  | 4(0.6)  | 355(4.1)  | 99(1.1)  | 29(1.0)       | 82(3.3)     |
| Number (%) of Type III           | 3(0.1)    | 3(0.1)   | 3(0.2)   | 0(0.0)  | 5(0.1)    | 5(0.1)   | 2(0.1)        | 2(0.1)      |

doi:10.1371/journal.pone.0114993.t002

patients were reclassified into two additional groups: all those with back pain (Group 6) and all those with neck pain (Group 7) in order to simplify the remaining analyses. A comparison of Groups 6 and 7 showed that Type I and II MCs were more common in the lumbar spine of patients with low back pain than in the cervical spine of patients with neck pain (Table 2).

The effects of age, degeneration, and spinal level on the prevalence of cervical and lumbar MCs are shown in Tables 3 and 4 respectively. In both regions, MCs increased with age, grade of disc degeneration, and spinal level. Spearman rank correlations showed that these trends were significant in both regions (Table 5). MCs were also more prevalent in patients with kyphotic (compared to non-kyphotic) spinal curves, in both lumbar (P=0.00) and cervical (P=0.00) regions (Table 6).

### Modic changes and pain

As shown in Table 2, the prevalence of any MCs was higher in patients with spinal pain (Groups 6 and 7) than in the corresponding asymptomatic patients (Groups 4 and 5 respectively), in both the lumbar spine (P=0.00) and cervical spine (P=0.00).

## Discussion

### Summary of results

In this study, we compared the prevalence of MCs in the lumbar and cervical spines of patients with and without spinal pain, and estimated their association with pain, age, disc degeneration, spinal level and spinal curvature. Type II MCs were most common and Type III were least common in all three patient groups. The prevalence of lumbar MCs in people with back pain was little affected by the presence of concurrent neck pain, and the same was true for cervical MCs in

**Table 3.** Cervical MCs: distribution according to disc degeneration, spinal level and age.

|                 | MC type | Disc degeneration grade |      |      |     |    | Spinal level |      |      |      |      |       | Age range (yrs) |       |       |     |
|-----------------|---------|-------------------------|------|------|-----|----|--------------|------|------|------|------|-------|-----------------|-------|-------|-----|
|                 |         | I                       | II   | III  | IV  | V  | C2/3         | C3/4 | C4/5 | C5/6 | C6/7 | C7/T1 | <40             | 40~49 | 50~59 | >60 |
| <b>Group 2</b>  | 0       | 102                     | 1334 | 4320 | 270 | 4  | 1023         | 1013 | 1005 | 971  | 1000 | 1018  | 1933            | 2268  | 1267  | 562 |
|                 | I       | 0                       | 0    | 9    | 26  | 0  | 0            | 1    | 6    | 21   | 6    | 1     | 5               | 9     | 14    | 7   |
|                 | II      | 0                       | 4    | 20   | 39  | 7  | 0            | 9    | 12   | 29   | 16   | 4     | 6               | 15    | 25    | 24  |
|                 | III     | 0                       | 0    | 0    | 2   | 1  | 0            | 0    | 0    | 2    | 1    | 0     | 0               | 0     | 2     | 1   |
|                 | Total   | 102                     | 1338 | 4349 | 337 | 12 | 1023         | 1023 | 1023 | 1023 | 1023 | 1023  | 1944            | 2292  | 1308  | 594 |
| <b>Group 3*</b> | 0       | 654                     | 1165 | 1055 | 64  | 0  | 497          | 495  | 494  | 480  | 477  | 495   | 1059            | 1102  | 582   | 195 |
|                 | I       | 0                       | 1    | 6    | 6   | 0  | 0            | 0    | 1    | 6    | 6    | 0     | 3               | 5     | 4     | 1   |
|                 | II      | 1                       | 4    | 9    | 14  | 1  | 0            | 1    | 2    | 11   | 13   | 2     | 12              | 8     | 7     | 2   |
|                 | III     | 0                       | 0    | 0    | 2   | 0  | 0            | 1    | 0    | 0    | 1    | 0     | 0               | 1     | 1     | 0   |
|                 | Total   | 655                     | 1170 | 1070 | 86  | 1  | 497          | 497  | 497  | 497  | 497  | 497   | 1074            | 1116  | 594   | 198 |

\*Data from patients in Group 3 with neck pain.

doi:10.1371/journal.pone.0114993.t003

people with neck pain with or without concurrent back pain. The prevalence of lumbar MCs in all patents with back pain was greater than that of cervical MCs in those with neck pain. Both lumbar and cervical MCs increased with disc degeneration and decreasing spinal level, and in both regions, kyphotic spinal curvature was associated with a greater prevalence of MCs (Table 6). According to our results, a causal relationship was not proven but there is a significantly higher prevalence of MCs in patients with back and neck pain.

**Table 4.** Lumbar MCs: distribution according to disc degeneration, spinal level and age.

|                 | MC type | Disc degeneration grade |      |      |     |    | Spinal level |      |      |      |       | Age range (yrs) |      |      |     |
|-----------------|---------|-------------------------|------|------|-----|----|--------------|------|------|------|-------|-----------------|------|------|-----|
|                 |         | I                       | II   | III  | IV  | V  | L1/2         | L2/3 | L3/4 | L4/5 | L5/S1 | <40             | 4049 | 5059 | >60 |
| <b>Group 1</b>  | 0       | 1865                    | 1617 | 1504 | 748 | 47 | 1212         | 1203 | 1192 | 1126 | 1048  | 2015            | 1867 | 1149 | 750 |
|                 | I       | 1                       | 9    | 15   | 28  | 5  | 3            | 3    | 8    | 12   | 32    | 14              | 21   | 16   | 7   |
|                 | II      | 6                       | 19   | 75   | 140 | 33 | 7            | 17   | 23   | 85   | 141   | 31              | 91   | 83   | 68  |
|                 | III     | 0                       | 1    | 0    | 2   | 0  | 1            | 0    | 0    | 0    | 2     | 0               | 1    | 2    | 0   |
|                 | Total   | 1872                    | 1646 | 1594 | 918 | 85 | 1223         | 1223 | 1223 | 1223 | 1223  | 2060            | 1980 | 1250 | 725 |
| <b>Group 3*</b> | 0       | 412                     | 1393 | 533  | 44  | 0  | 493          | 487  | 482  | 462  | 458   | 863             | 882  | 475  | 162 |
|                 | I       | 2                       | 0    | 9    | 6   | 2  | 0            | 3    | 2    | 6    | 8     | 13              | 10   | 4    | 1   |
|                 | II      | 0                       | 13   | 43   | 22  | 4  | 4            | 6    | 13   | 29   | 30    | 62              | 37   | 15   | 2   |
|                 | III     | 0                       | 0    | 1    | 0   | 1  | 0            | 1    | 0    | 0    | 1     | 1               | 1    | 1    | 0   |
|                 | Total   | 414                     | 1406 | 586  | 72  | 7  | 497          | 497  | 497  | 497  | 497   | 895             | 930  | 495  | 165 |

\*Data from patients in Group 3 with back pain.

doi:10.1371/journal.pone.0114993.t004

**Table 5.** Association of Modic changes in various patient groups\*.

|                                | Group 1                   |       | Group 2                   |       |
|--------------------------------|---------------------------|-------|---------------------------|-------|
|                                | Spearman rank correlation | P     | Spearman rank correlation | P     |
| <b>Disc degeneration grade</b> | 0.266                     | 0.000 | 0.220                     | 0.000 |
| <b>Spine level</b>             | 0.206                     | 0.000 | 0.087                     | 0.000 |
| <b>Age range (yrs)</b>         | 0.116                     | 0.000 | 0.217                     | 0.000 |

\*Analyzed by Spearman rank correlation.

doi:10.1371/journal.pone.0114993.t005

### Strengths and limitations of the study

As far as the authors are aware, this is the first large scale study comparing lumbar and cervical Modic changes in people with and without spinal pain. The MRIs were evaluated by an experienced radiologist and orthopaedic surgeon which led

**Table 6.** The prevalence of MCs in patients with kyphotic and non-kyphotic spines.

|                                                      | MC type   | Spinal curvature |              | P     | Total |
|------------------------------------------------------|-----------|------------------|--------------|-------|-------|
|                                                      |           | Kyphotic         | Non-kyphotic |       |       |
| <b>Group 1: back pain only (lumbar levels)</b>       | 0         | 2289             | 3492         | 0.00  | 5781  |
|                                                      | I         | 44               | 14           | 0.00  | 58    |
|                                                      | II        | 185              | 88           | 0.00  | 273   |
|                                                      | III       | 2                | 1            | 0.573 | 3     |
|                                                      | MCs total | 231              | 103          | 0.00  | 334   |
|                                                      | Total     | 2520             | 3595         |       | 6115  |
| <b>Group 3: back and neck pain (lumbar levels)</b>   | 0         | 794              | 1588         | 0.00  | 2382  |
|                                                      | I         | 14               | 5            | 0.00  | 19    |
|                                                      | II        | 56               | 26           | 0.00  | 82    |
|                                                      | III       | 2                | 0            | 0.05  | 2     |
|                                                      | MCs total | 72               | 31           | 0.00  | 103   |
|                                                      | Total     | 866              | 1619         |       | 2485  |
| <b>Group 2: neck pain only (cervical levels)</b>     | 0         | 1864             | 4166         | 0.00  | 6030  |
|                                                      | I         | 31               | 4            | 0.00  | 35    |
|                                                      | II        | 54               | 16           | 0.00  | 70    |
|                                                      | III       | 3                | 0            | 0.01  | 3     |
|                                                      | MCs total | 88               | 20           | 0.00  | 108   |
|                                                      | Total     | 1952             | 4186         |       | 6138  |
| <b>Group 3: back and neck pain (cervical levels)</b> | 0         | 989              | 1949         | 0.00  | 2938  |
|                                                      | I         | 8                | 5            | 0.03  | 13    |
|                                                      | II        | 22               | 7            | 0.00  | 29    |
|                                                      | III       | 1                | 1            | 0.63  | 2     |
|                                                      | MCs total | 31               | 13           | 0.00  | 44    |
|                                                      | Total     | 1020             | 1962         |       | 2982  |

doi:10.1371/journal.pone.0114993.t006

to good levels of reliability in evaluating the presence and types of MC, and the grading of disc degeneration. The main limitation of this cross-sectional study is that it can assess associations only, rather than cause and effect. Cervical MRI scans are not included in routine checkups in China, so our sample size of asymptomatic cervical MRI scans was relatively small.

### Relationship to previous work

Eugen et al [17] [18] reported that MCs in the cervical spine are a dynamic phenomenon [17] that is associated with disc degeneration [18]. In our study also, MCs were positively associated with disc degeneration and age, supporting this previous research.

### Explanation of results

Two aspects are important in the origins of MCs: biomechanics and biochemistry. The spine is a nonlinear viscoelastic structure, and the vertebral endplates comprise its 'weak link'. Axial (compressive) loading deforms the bone and cartilage endplates, and excessive or repetitive loading may result in irreversible injury. MCs may arise from this mechanism. Compared to superincumbent body weight, the cervical spine is relatively weak in bending, but relatively strong in compression [19]. This could explain why the prevalence of MCs is lower in the cervical spine compared to the lumbar.

Endplates play an important role in disc nutrient transport [20], so endplate damage followed by calcification could reduce this transport and accelerate the process of disc degeneration. Endplate damage also decompresses the adjacent disc [21] and has been shown to cause disc degeneration in animal models [22]. Either mechanism could explain why MCs were associated with increased age and disc degeneration in the present study.

The association between MCs and increased kyphosis can be explained by reduced vertical shock absorption in a flattened spine. This would increase the risk of endplate damage during incidents such as a fall on the buttocks. Wu et al. have shown a *higher* prevalence of MCs in patients with degenerative scoliosis [23], but this frontal-plane spinal curvature is primarily structural and can not be equated with sagittal plane curvature (lordosis) which is more functional than structural.

The results of our study suggest that disc degeneration is associated with MCs, both in the lumbar and cervical spine. However, the exact relationship between MCs and disc degeneration was not clarified and we cannot conclude that disc degeneration results in MCs or *vice versa*. The influence of spinal level on the occurrence of MCs could be due to increased disc degeneration at lower levels, but other explanations are possible. Associations between MCs and age may also be related to disc degeneration [24–28].

## Clinical relevance

Although it is one of the most common disorders of middle and old age, low back/neck pain is often difficult to explain in terms of pathological anatomy. Most (almost 80%) is classified as non-specific pain, which can be unsatisfying for both patients and surgeons. Therefore, a causal relationship was not proven but there is a significantly higher prevalence of MCs in patients with back and neck pain.

Normal spine curvature is a manifestation of biomechanical balance, and increased kyphosis can be an early indication of degenerative disease in both the lumbar and cervical spine. Postural education could possibly help to maintain normal lordosis, and reduce the risk of endplate damage, MCs, and pain.

## Suggestions for future work

Our sample size of asymptomatic cervical patients is relatively small and we will expand our data base to investigate more accurately the prevalence of cervical MCs in asymptomatic patients in the future.

## Conclusion

In patients with back or neck pain, MCs of the lumbar endplate mainly occurred at L5/S1, and then at L4/5, while those affecting the cervical endplate mostly occurred at C5/6, then at C4/5 and C6/7. The prevalence of MCs in the lumbar spine was much higher than in the cervical spine, probably because the latter is less vulnerable to compressive overload. Type II MCs were the most common and Type III the least, both in the lumbar and cervical spine. MCs increased with age, spinal pain, increasing disc degeneration, increased kyphosis, and at lower spinal levels, although the causal mechanisms are not clear.

## Acknowledgments

The authors wish to express their gratitude to Prof. Michael Adams and Dr. Patricia Dolan for help with the manuscript.

## Author Contributions

Conceived and designed the experiments: SYLT LSY CJ. Performed the experiments: SYLT LSY CJ LJH WCY SZ FDZ FSW. Analyzed the data: SYLT LSY CJ MWLJM. Contributed reagents/materials/analysis tools: LJH WCY. Contributed to the writing of the manuscript: SYLT LSY SZ FDZ.

## References

1. Modic MT, Steinberg PM, Ross JS, Masaryk TJ, Carter JR (1988) Degenerative disk disease: assessment of changes in vertebral body marrow with MR imaging. *Radiology* 166: 193–199.

2. **Modic MT, Masaryk TJ, Ross JS, Carter JR** (1988) Imaging of degenerative disk disease. *Radiology* 168: 177–186.
3. **de Roos A, Kressel H, Spritzer C, Dalinka M** (1987) MR imaging of marrow changes adjacent to end plates in degenerative lumbar disk disease. *AJR Am J Roentgenol* 149: 531–534.
4. **Vital JM, Gille O, Pointillart V, Pedram M, Bacon P, et al.** (2003) Course of Modic 1 six months after lumbar posterior osteosynthesis. *Spine (Phila Pa 1976)* 28: 715–720; discussion 721.
5. **Schmid G, Witteler A, Willburger R, Kuhnen C, Jergas M, et al.** (2004) Lumbar disk herniation: correlation of histologic findings with marrow signal intensity changes in vertebral endplates at MR imaging. *Radiology* 231: 352–358.
6. **Kuisma M, Karppinen J, Niinimäki J, Ojala R, Haapea M, et al.** (2007) Modic changes in endplates of lumbar vertebral bodies: prevalence and association with low back and sciatic pain among middle-aged male workers. *Spine (Phila Pa 1976)* 32: 1116–1122.
7. **Karchevsky M, Schweitzer ME, Carrino JA, Zoga A, Montgomery D, et al.** (2005) Reactive endplate marrow changes: a systematic morphologic and epidemiologic evaluation. *Skeletal Radiol* 34: 125–129.
8. **Jones A, Clarke A, Freeman BJ, Lam KS, Grevitt MP** (2005) The Modic classification: inter- and intraobserver error in clinical practice. *Spine (Phila Pa 1976)* 30: 1867–1869.
9. **Hansson T, Roos B** (1981) Microcalluses of the trabeculae in lumbar vertebrae and their relation to the bone mineral content. *Spine (Phila Pa 1976)* 6: 375–380.
10. **Crock HV** (1986) Internal disc disruption. A challenge to disc prolapse fifty years on. *Spine (Phila Pa 1976)* 11: 650–653.
11. **Burke JG, Watson RW, McCormack D, Dowling FE, Walsh MG, et al.** (2002) Intervertebral discs which cause low back pain secrete high levels of proinflammatory mediators. *J Bone Joint Surg Br* 84: 196–201.
12. **Hutton MJ, Bayer JH, Powell JM** (2011) Modic vertebral body changes: the natural history as assessed by consecutive magnetic resonance imaging. *Spine (Phila Pa 1976)* 36: 2304–2307.
13. **Pfirschmann CW, Metzendorf A, Zanetti M, Hodler J, Boos N** (2001) Magnetic resonance classification of lumbar intervertebral disc degeneration. *Spine (Phila Pa 1976)* 26: 1873–1878.
14. **Cheung KM, Karppinen J, Chan D, Ho DW, Song YQ, et al.** (2009) Prevalence and pattern of lumbar magnetic resonance imaging changes in a population study of one thousand forty-three individuals. *Spine (Phila Pa 1976)* 34: 934–940.
15. **Suzuki N, Endo S** (1983) A quantitative study of trunk muscle strength and fatigability in the low-back-pain syndrome. *Spine (Phila Pa 1976)* 8: 69–74.
16. **Borden AG, Rechtman AM, Gershon-Cohen J** (1960) The normal cervical lordosis. *Radiology* 74: 806–809.
17. **Mann E, Peterson CK, Hodler J, Pfirschmann CW** (2014) The evolution of degenerative marrow (Modic) changes in the cervical spine in neck pain patients. *Eur Spine J* 23: 584–589.
18. **Mann E, Peterson CK, Hodler J** (2011) Degenerative marrow (modic) changes on cervical spine magnetic resonance imaging scans: prevalence, inter- and intra-examiner reliability and link to disc herniation. *Spine (Phila Pa 1976)* 36: 1081–1085.
19. **Przybyla AS, Skrzypiec D, Pollintine P, Dolan P, Adams MA** (2007) Strength of the cervical spine in compression and bending. *Spine (Phila Pa 1976)* 32: 1612–1620.
20. **Wang YX, Griffith JF** (2011) Menopause causes vertebral endplate degeneration and decrease in nutrient diffusion to the intervertebral discs. *Med Hypotheses* 77: 18–20.
21. **Adams MA, Freeman BJ, Morrison HP, Nelson IW, Dolan P** (2000) Mechanical initiation of intervertebral disc degeneration. *Spine (Phila Pa 1976)* 25: 1625–1636.
22. **Holm S, Holm AK, Ekstrom L, Karladani A, Hansson T** (2004) Experimental disc degeneration due to endplate injury. *J Spinal Disord Tech* 17: 64–71.
23. **Wu HL, Ding WY, Shen Y, Zhang YZ, Guo JK, et al.** (2012) Prevalence of vertebral endplate modic changes in degenerative lumbar scoliosis and its associated factors analysis. *Spine (Phila Pa 1976)* 37: 1958–1964.

24. **Adams MA, Dolan P** (2012) Intervertebral disc degeneration: evidence for two distinct phenotypes. *J Anat* 221: 497–506.
25. **Wang Y, Videman T, Battie MC** (2012) ISSLS prize winner: Lumbar vertebral endplate lesions: associations with disc degeneration and back pain history. *Spine (Phila Pa 1976)* 37: 1490–1496.
26. **Wang Y, Videman T, Battie MC** (2012) Lumbar vertebral endplate lesions: prevalence, classification, and association with age. *Spine (Phila Pa 1976)* 37: 1432–1439.
27. **Wang Y, Videman T, Battie MC** (2012) Modic changes: prevalence, distribution patterns, and association with age in white men. *Spine J* 12: 411–416.
28. **Peterson CK, Humphreys BK, Pringle TC** (2007) Prevalence of modic degenerative marrow changes in the cervical spine. *J Manipulative Physiol Ther* 30: 5–10.
